# Supplementary material for: Theoretical insights into the compatibility of template-monomer-crosslinker-solvent for cortisol molecularly imprinted polymer pre-polymerization
Source: Royal Society of Chemistry journal article supplement (doi:10.1039/d3me00077j), 2023-10-25
Supplement: d3me00077j1.pdf [file d3me00077j1.pdf]

### Supplementary information

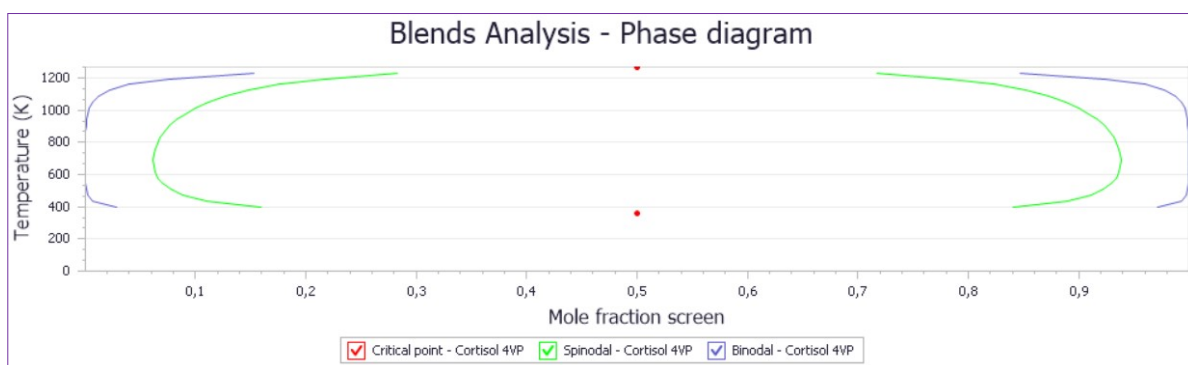

Figure S1: Cort-4VP phase diagram

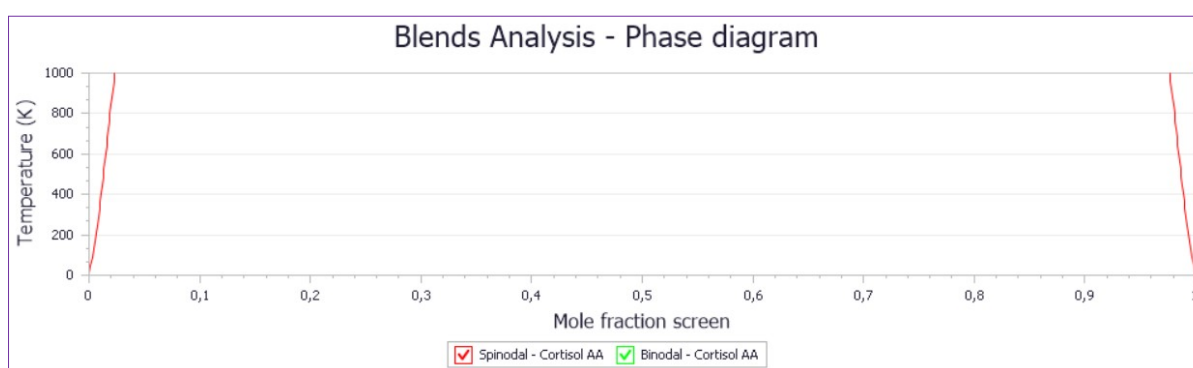

Figure S2: Cort-AA phase diagram

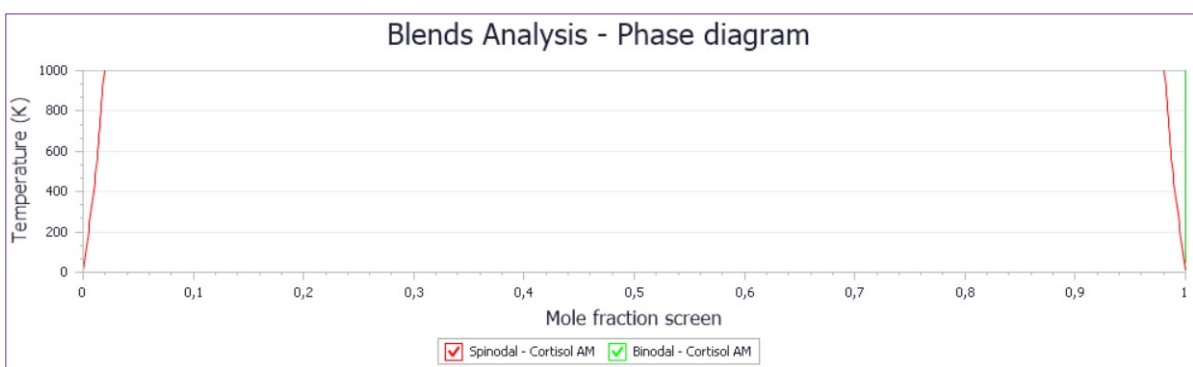

Figure S3: Cort-AM phase diagram

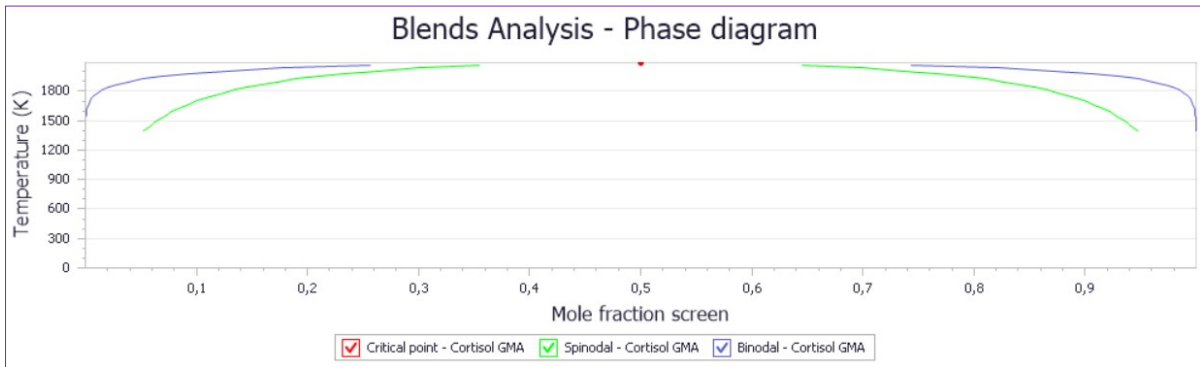

Figure S4: Cort-GMA phase diagram

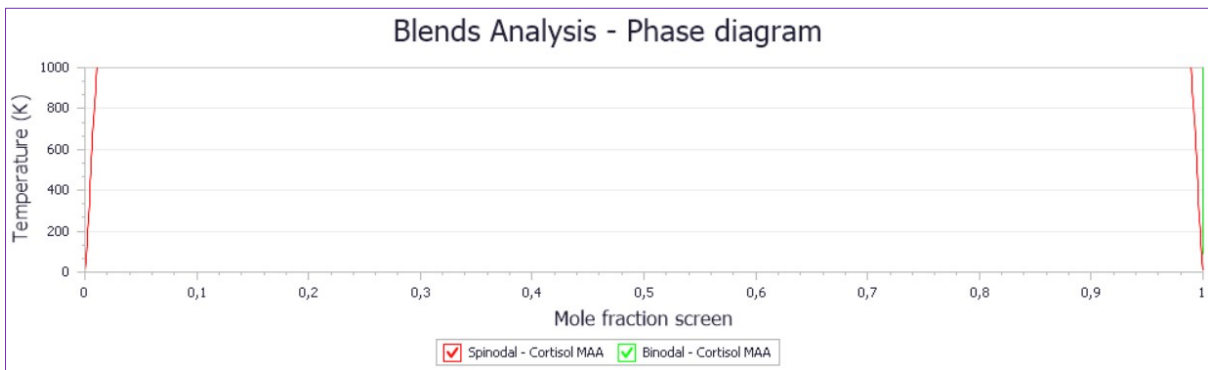

Figure S5: Cort-HEMA phase diagram

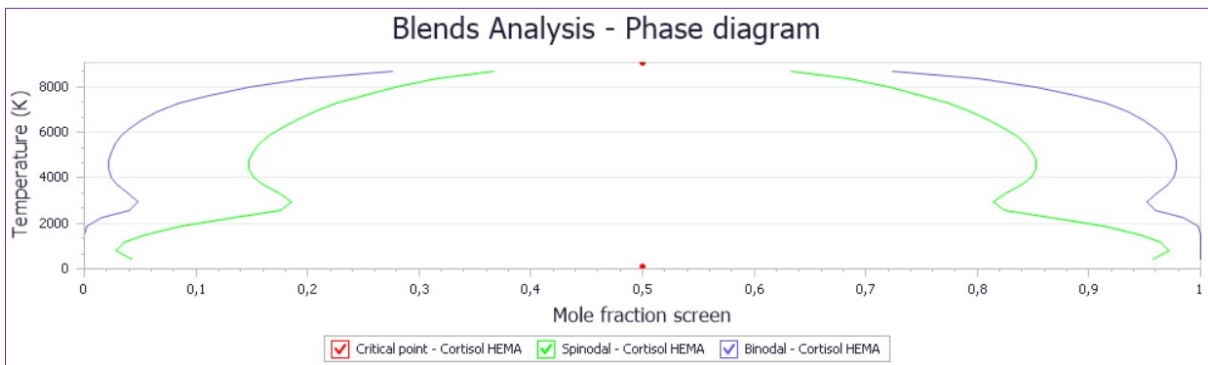

Figure S6: Cort-MAA phase diagram

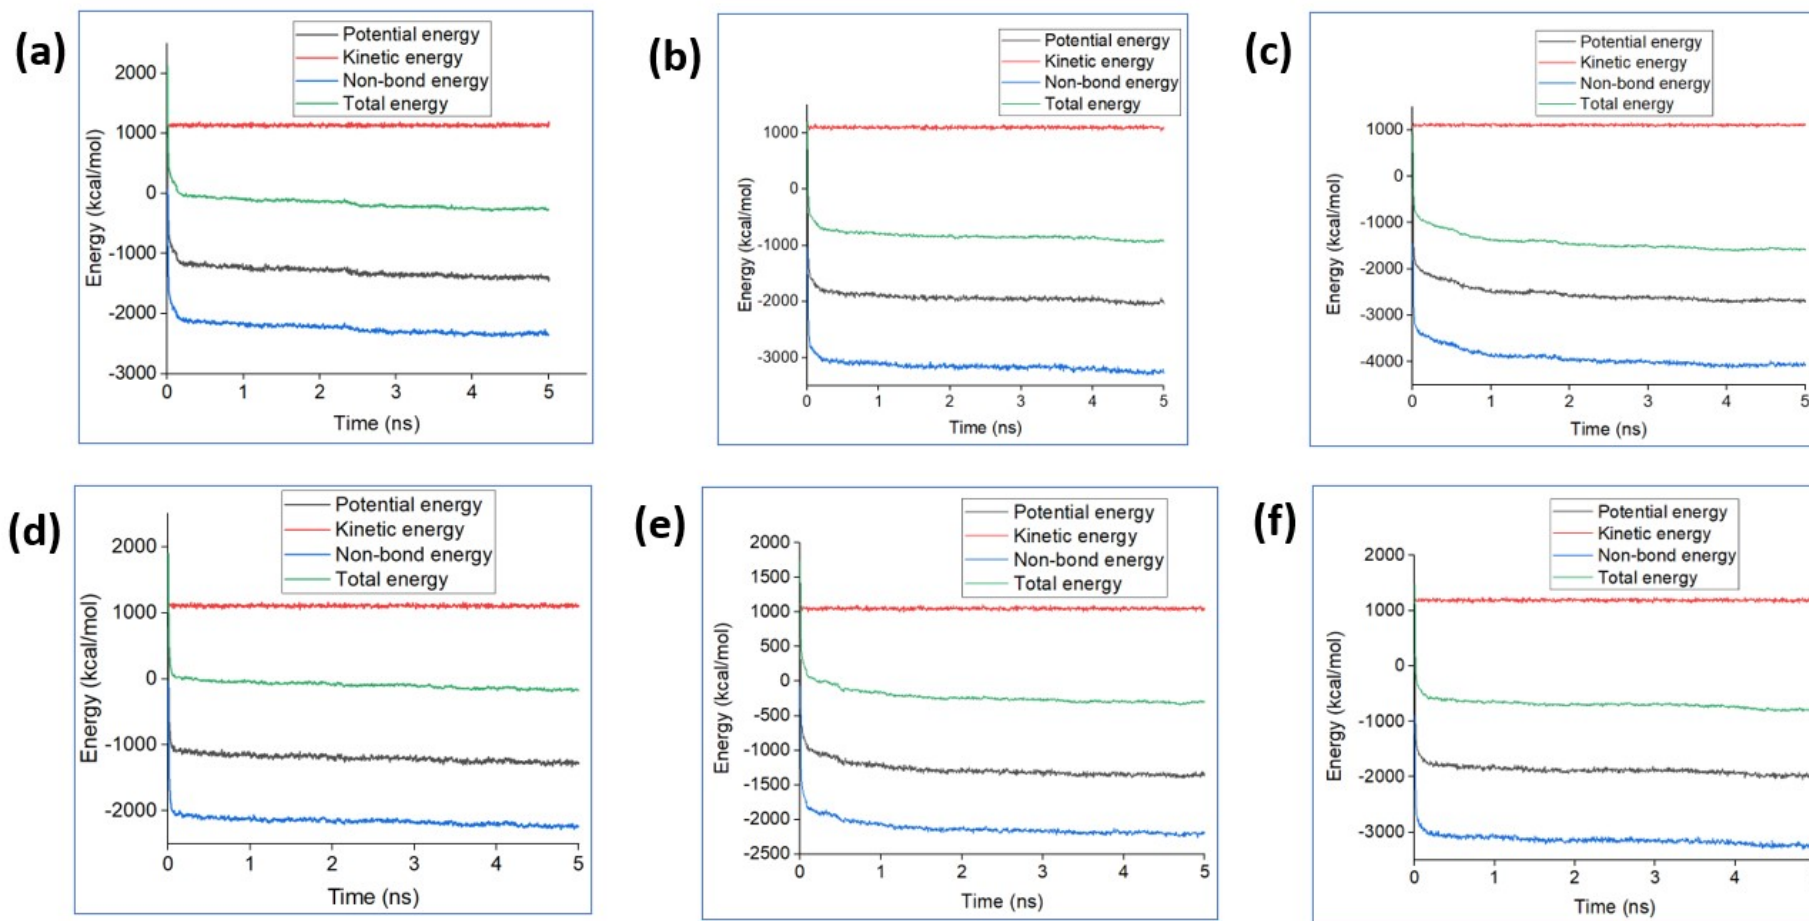

**Figure S7:** Thermodynamic equilibrium energies observed during 5.0 ns simulation time for the systems (a) Cort-4VP, (b) Cort-AA, (c) Cort-AM, (d) Cort-GMA, (e) Cort-HEMA and (f) Cort-MAA

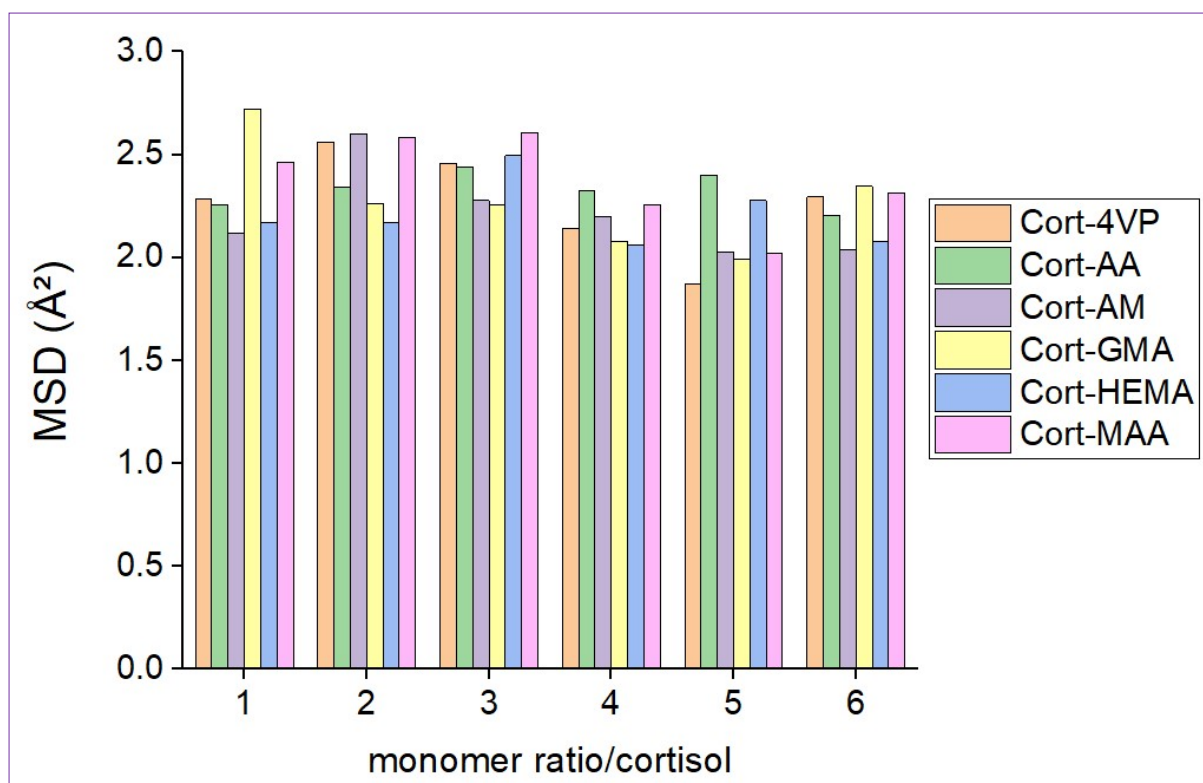

**Figure S8:** The mean square displacement (MSD) maximal for all the ratios
